# Supplementary material
Source: PubMed Central journal article supplement (PMC8626098)

**Figure 3b**

Blot 1 - boxes indicate regions shown in figure, each image is either a different channel, antibody, or different exposure of the same blot

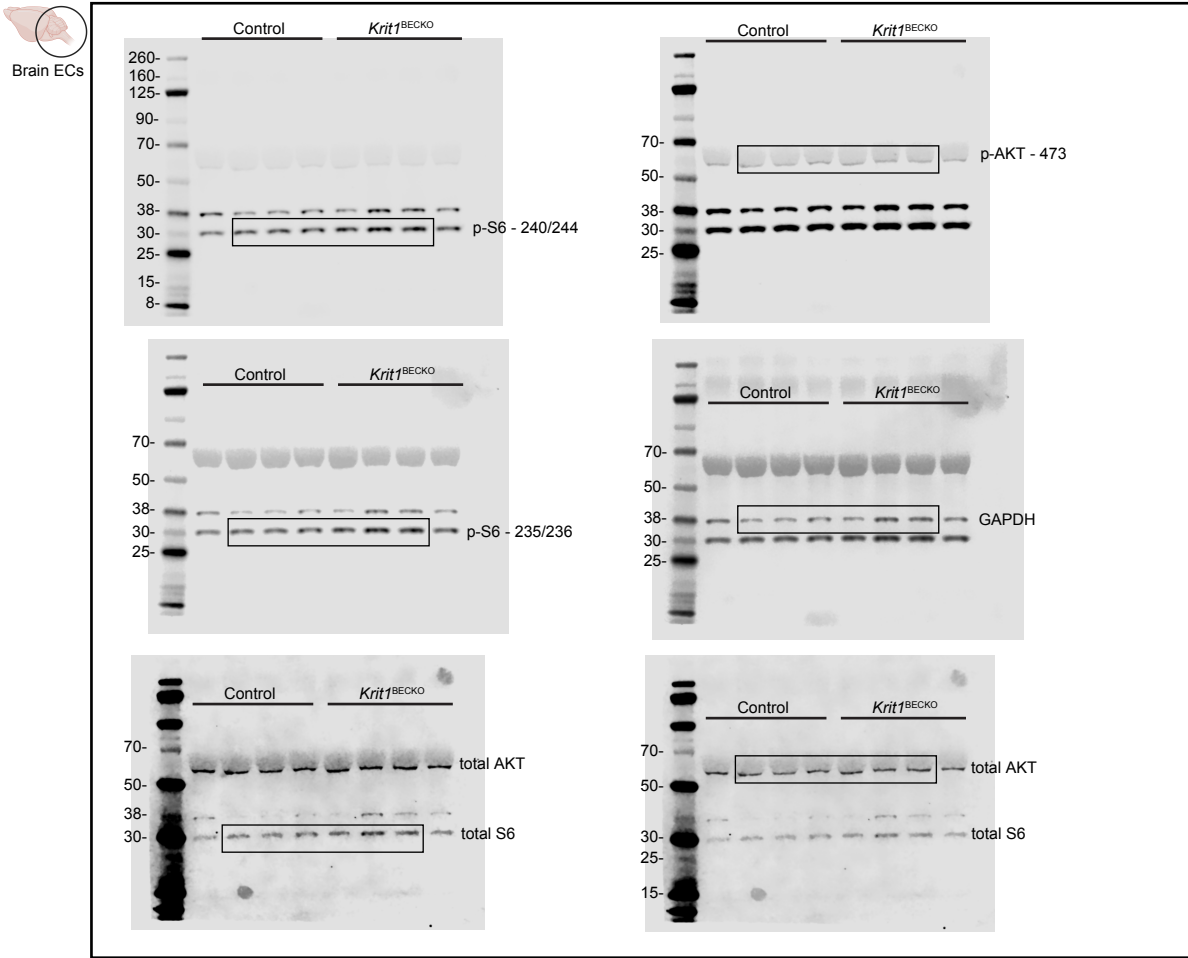

Blot 2 - not shown in figure, used for quantification

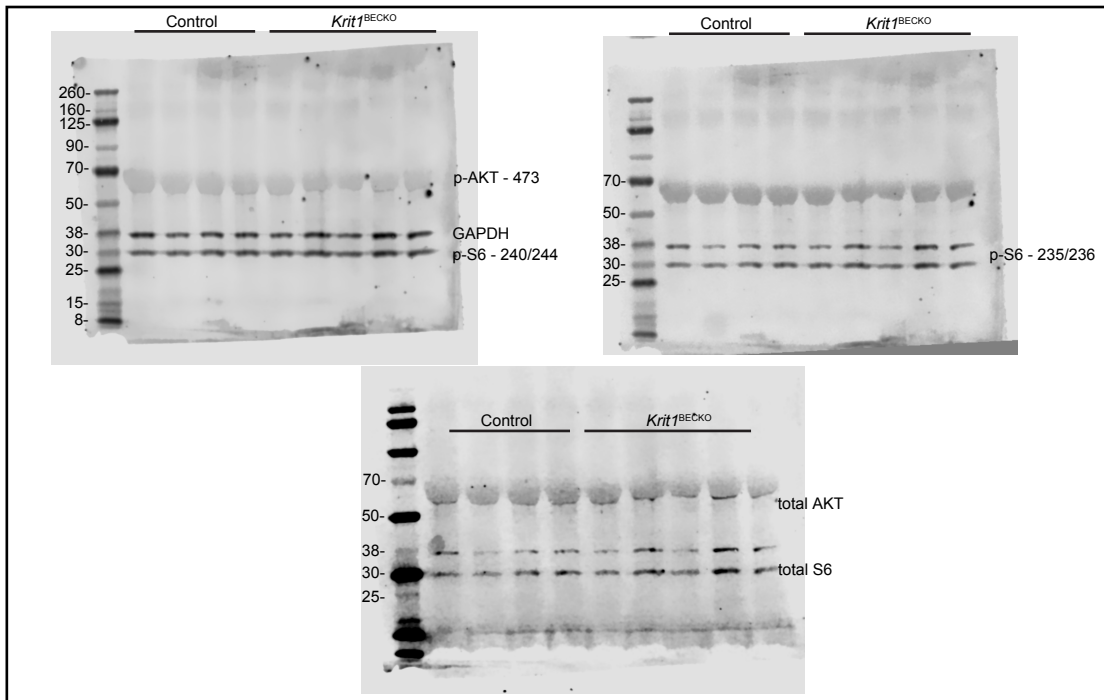

**Figure 3d.**

Blot 1 - boxes indicate regions shown in figure, each image is either a different channel, antibody, or different exposure of the same blot

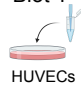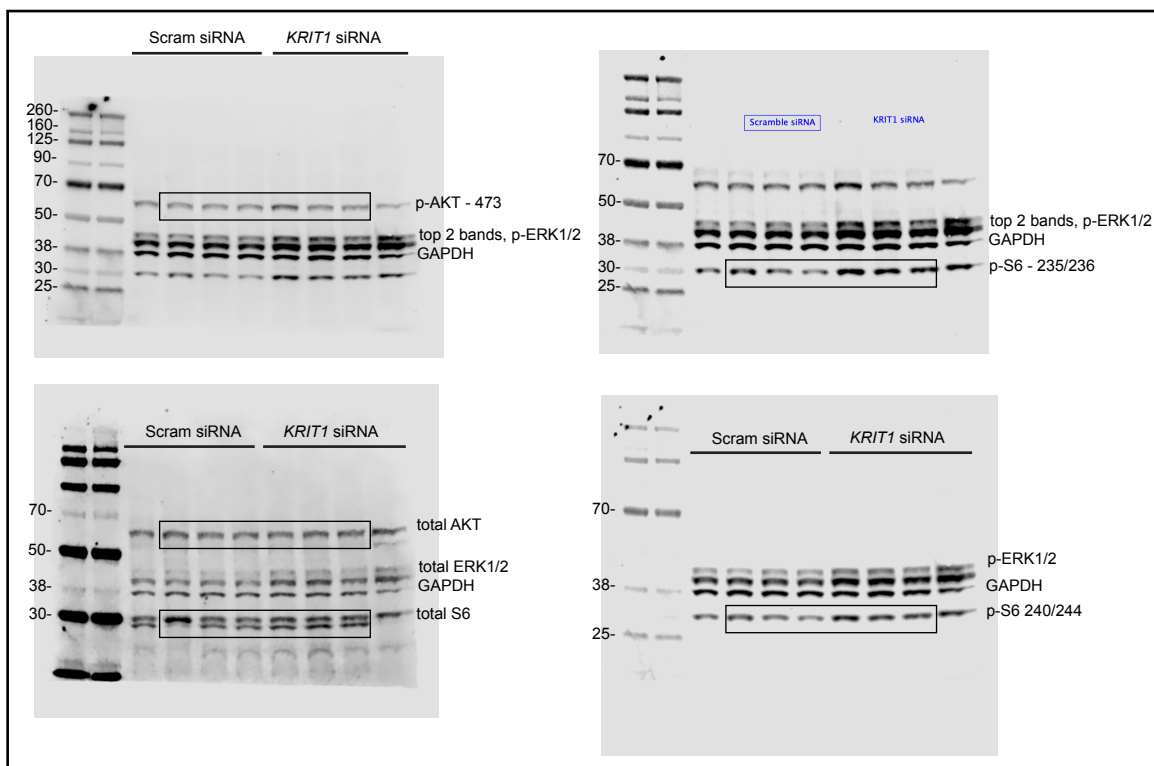

Blot 2 - not shown in figure, used for quantification

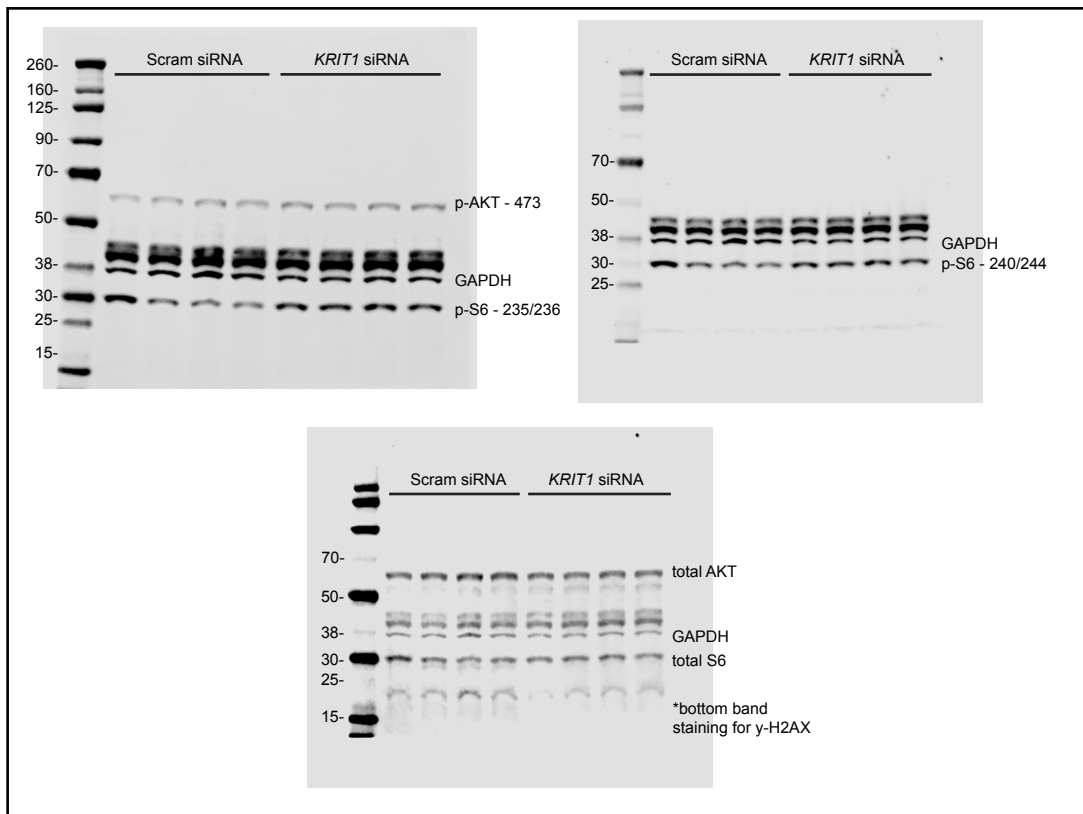

Figure 3h.

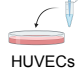

Blot 1 - boxes indicate regions shown in figure 3

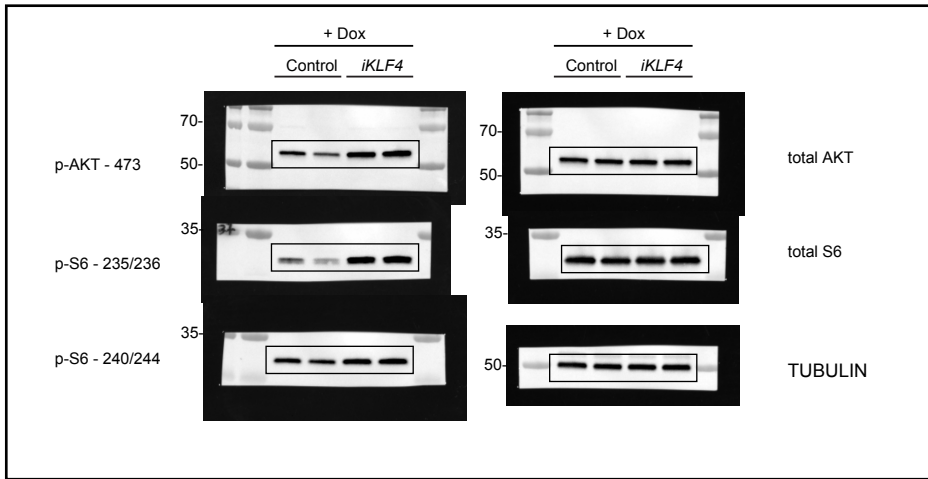

Blot 2 - not shown in figure, used for quantification

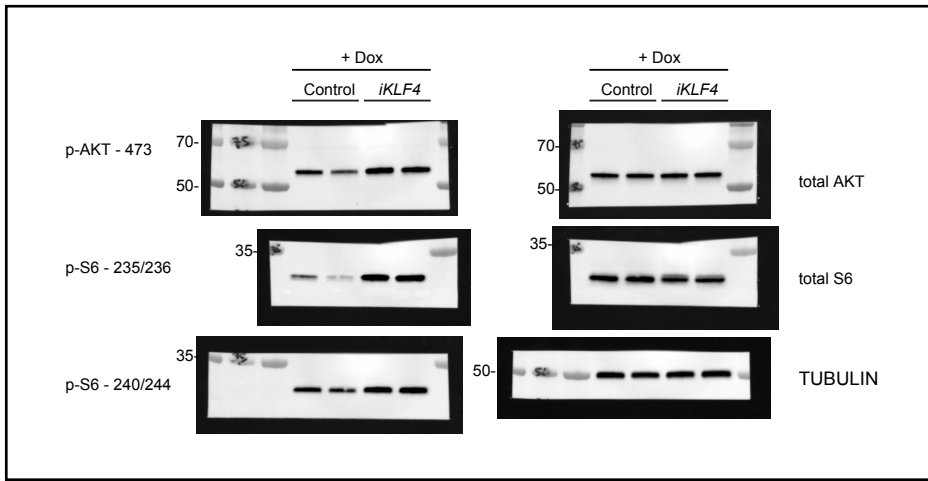

Blot 3 - not shown in figure, used for quantification

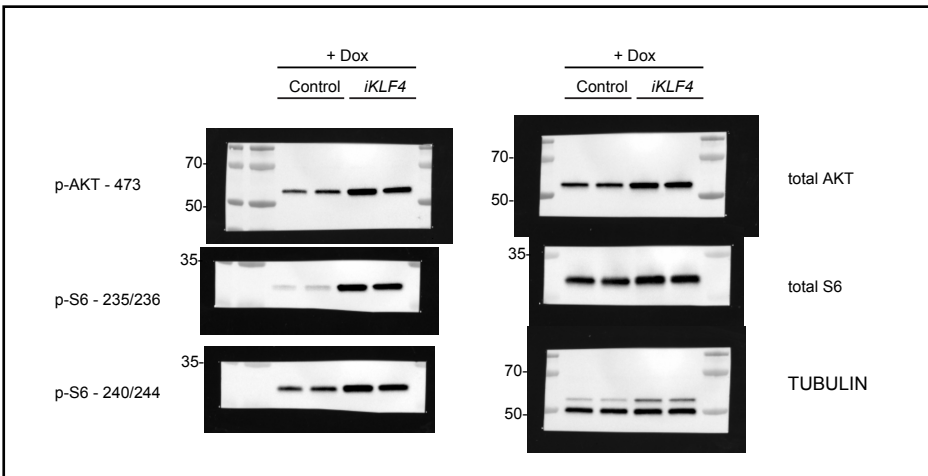

**Extended Data Figure 9.**

Blot 1 - boxes indicate regions shown in Extended Data Figure 9

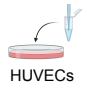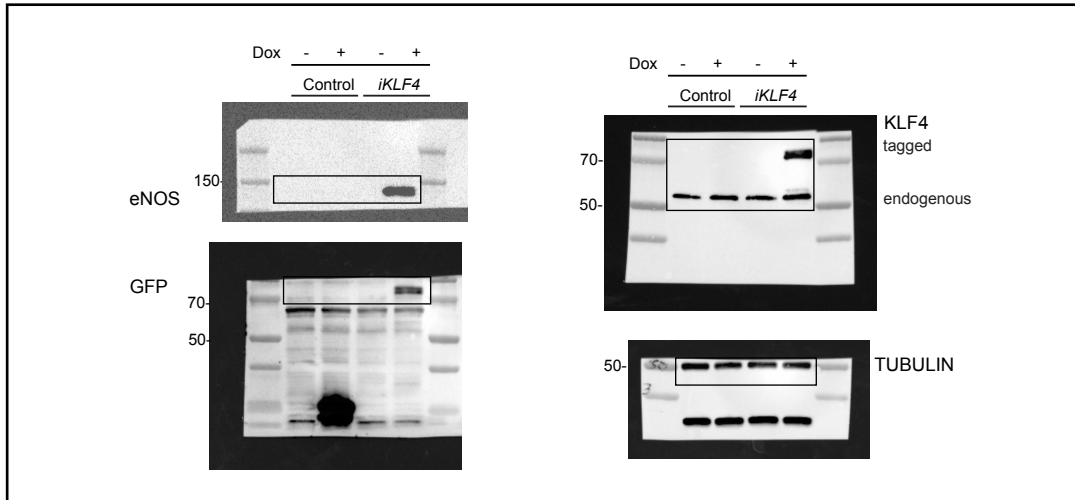

Supplement: NIHMS1718518-supplement-Supplemental_Figure_1.pdf [file NIHMS1718518-supplement-Supplemental_Figure_1.pdf]
