# Supplementary material
Source: PubMed Central journal article supplement (PMC8626098)
Supplement: NIHMS1718518-supplement-Table_Legends.pdf [file NIHMS1718518-supplement-Table_Legends.pdf]

1 **Supplementary Information**

2  
3 ***PIK3CA* and CCM mutations fuel cavernomas through a cancer-like mechanism**

4  
5 Aileen A. Ren<sup>1\*</sup>, Daniel A. Snellings<sup>2\*</sup>, Sophie Y. Su<sup>3</sup>, Courtney C. Hong<sup>1</sup>, Marco Castro<sup>4</sup>, Alan  
6 T. Tang<sup>1</sup>, Matthew R. Detter<sup>2</sup>, Nicholas Hobson<sup>5</sup>, Romuald Girard<sup>5</sup>, Sharbel Romanos<sup>5</sup>, Rhonda  
7 Lightle<sup>5</sup>, Thomas Moore<sup>5</sup>, Robert Shenkar<sup>5</sup>, Christian Benavides<sup>2</sup>, M. Makenzie Beaman<sup>2</sup>, Helge  
8 Mueller-Fielitz<sup>8</sup>, Mei Chen<sup>1</sup>, Patricia Mericko<sup>1</sup>, Jisheng Yang<sup>1</sup>, Derek C. Sung<sup>1</sup>, Michael T.  
9 Lawton<sup>6</sup>, Michael Ruppert<sup>7</sup>, Markus Schwaninger<sup>8</sup>, Jakob Körbelin<sup>9</sup>, Michael Potente<sup>4,10,11</sup>,  
10 Issam A. Awad<sup>5</sup>, Douglas A. Marchuk<sup>2</sup> and Mark L. Kahn<sup>1</sup>

11  
12 <sup>1</sup>Department of Medicine and Cardiovascular Institute, University of Pennsylvania, 3400 Civic  
13 Center Blvd, Philadelphia PA 1910

14  
15 <sup>2</sup>Department of Molecular Genetics and Microbiology, Duke University School of Medicine,  
16 Durham, North Carolina 27710, USA

17  
18 <sup>3</sup>Department of Neurosurgery, University of Pennsylvania, 3400 Civic Center Blvd Philadelphia  
19 PA 19104

20  
21 <sup>4</sup>Angiogenesis and Metabolism Laboratory, Max Planck institute for Heart and Lung Research,  
22 61231 Bad Nauheim, Germany

23  
24 <sup>5</sup>Neurovascular Surgery Program, Section of Neurosurgery, Department of Surgery, The  
25 University of Chicago Medicine and Biological Sciences, Chicago, Illinois, USA

26  
27 <sup>6</sup>Department of Neurosurgery, The Barrow Neurological Institute, Phoenix, AZ, USA

28  
29 <sup>7</sup>Cancer Institute, West Virginia University, Morgantown, WV 26506 USA

30  
31 <sup>8</sup>Institute for Experimental and Clinical Pharmacology and Toxicology, Center of Brain,  
32 Behavior and Metabolism, University of Lubeck, 23562 Lubeck, Germany

33  
34 <sup>9</sup>University Medical Center Hamburg-Eppendorf, Department of Oncology, Hematology and  
35 Bone Marrow Transplantation, 20246 Hamburg, Germany

36  
37 <sup>10</sup>Berlin Institute of Health (BIH) and Charité – Universitätsmedizin Berlin, corporate member of  
38 Freie Universität Berlin, Humboldt-Universität zu Berlin, Berlin, Germany

39  
40 <sup>11</sup>Max Delbrück Center for Molecular Medicine (MDC), 13125 Berlin, Germany

41  
42 \*These authors contributed equally to this manuscript.

43 Correspondence should be addressed to either D.A.M. (email: douglas.marchuk@duke.edu) or  
44 M.L.K. (email: markkahn@pennmedicine.upenn.edu)

45

46 **Supplementary Tables**

47

48 **Table S1 Human CCM bulk tissue mutation data:** Mutation data for each human CCM  
49 analyzed in this study using targeted sequencing, ddPCR, or SNaPshot. Each sample is notated  
50 as either familial (F), sporadic (S), or unknown (blank) as well as the affected gene for familial  
51 samples (CCM1/2/3). ddPCR and SNaPshot assay results for *PIK3CA* E542K, E545K, and  
52 H1047R for each sample are listed including the detected allele frequency as well as final  
53 mutation call. SNaPshot calls are color coded by variant and ddPCR results are colored  
54 according to the detected allele frequency for each variant. Sequencing data for *PIK3CA* are  
55 reported as the number of alt and ref reads supporting the listed variant, the allele frequency, and  
56 the final mutation call. *PIK3CA* variants shown in red text denote samples with insufficient  
57 coverage to make a definitive variant call per the thresholds detailed in the methods section;  
58 variant calls for these samples rely on a positive result by ddPCR and confirmation by a tertiary  
59 assay (SNaPshot). Germline and somatic mutations in the CCM genes are reported in respective  
60 columns listing the chromosomal coordinates in hg19, the predicted functional consequence of  
61 the variant, the number of reads supporting the alt and ref alleles, and the resulting allele  
62 frequency. The functional consequence of missense and in-frame indels are predicted by *in silico*  
63 tools SIFT (scale: 0-1, higher is more damaging) and PROVEAN (scale: continuous, <-2.5  
64 predicted damaging) where available.

65

66 **Table S2 Human CCM snDNA-seq read counts:** Number of total, mutant, and wild type  
67 supporting reads present in each nucleus for *PIK3CA* and CCM mutations. Each nucleus is  
68 denoted by an 18bp oligo barcode which is incorporated into each read to define the nucleus of  
69 origin. These data were processed to generate Fig 2e. and Extended Data Figure 7c-f.
